# Supplementary material for: Hydrogen production from methane at 200 to 500 °C – clean hydrogen production in conjunction with carbon fixation at 200 to 250 °C
Source: Royal Society of Chemistry journal article supplement (doi:10.1039/c7se00572e), 2018-01-01
Supplement: c7se00572e1.pdf [file c7se00572e1.pdf]

## **Supplementary Information**

### **Hydrogen production from methane at 200 to 500 °C — Clean hydrogen production in conjunction with carbon fixation at 200 to 250 °C —**

Baowang Lu\*, Mitsuhiro Inoue, Takayuki Abe

Correspondence to: [baowangl@ctg.u-toyama.ac.jp](mailto:baowangl@ctg.u-toyama.ac.jp)

**This file includes:**

∞ Supplementary Figure S1 to S3

## Supplementary Figure

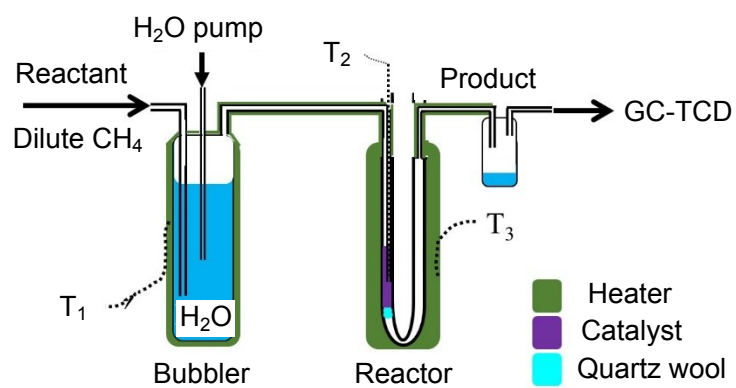

**Fig. S1** Schematic image of catalytic reaction system.

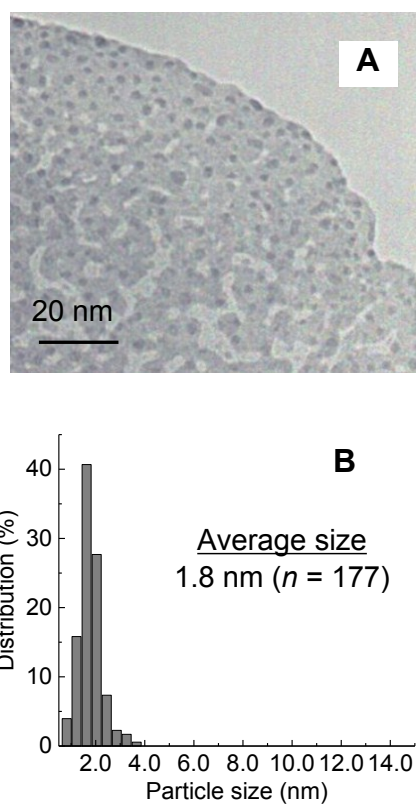

**Fig. S2** (A) A TEM image of BS-Ru/C catalyst and (B) the size distribution of the deposited Ru particles ( $n$ : particle count number).

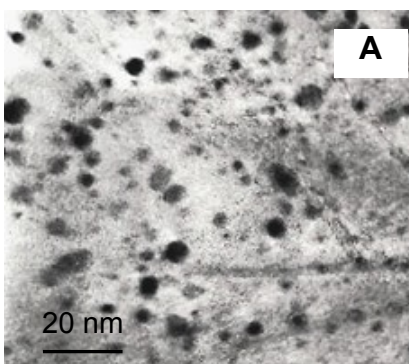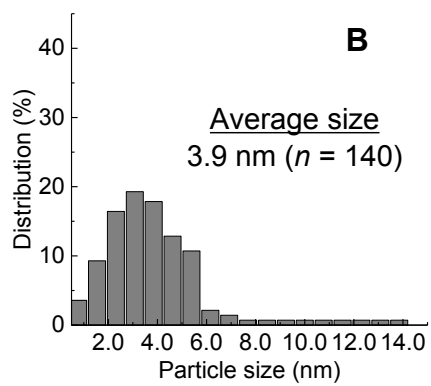

**Fig. S3** (A) A TEM image of Ref.-Ru/C catalyst and (B) the size distribution of the deposited Ru particles ( $n$ : particle count number).
